# Fractional Esterification Rate of Cholesterol and Ratio of Triglycerides to HDL-Cholesterol Are Powerful Predictors of Positive Findings on Coronary Angiography

JIRI FROHLICH<sup>1\*</sup> and MILADA DOBIÁŠOVÁ<sup>2</sup>

**Background:** We examined the predictive value of various clinical and biochemical markers for angiographically defined coronary artery disease (aCAD). Specifically, we assessed the value of the ratio of plasma triglyceride (TGs) to HDL-cholesterol (HDL-C) and the fractional esterification rate of cholesterol in plasma depleted of apolipoprotein B (apoB)-containing lipoproteins ( $FER_{HDL}$ ), a functional marker of HDL and LDL particle size.

**Methods:** Patients (788 men and 320 women) undergoing coronary angiography were classified into groups with positive [aCAD(+)] and negative [aCAD(–)] findings. Patient age, body mass index, waist circumference, blood pressure (BP), medications, drinking, smoking, exercise habits, and plasma total cholesterol (TC), LDL-cholesterol (LDL-C), HDL-unesterified cholesterol, HDL-C, TGs,  $FER_{HDL}$ , apoB,  $\log(TG/HDL-C)$ , and TC/HDL-C were assessed. Lipids and apoproteins were measured by standard laboratory procedures;  $FER_{HDL}$  was determined by a radioassay.

**Results:** Members of the aCAD(+) group were older and had a higher incidence of smoking and diabetes than those in the aCAD(–) group. The aCAD(+) group also had higher TG, apoB,  $FER_{HDL}$ , and  $\log(TG/HDL-C)$  and lower HDL-C values. aCAD(+) women had greater waist circumference and higher plasma TC and TC/HDL-C. aCAD(+) men, but not women, had higher plasma LDL-C. In the multivariate logistic model, the

significant predictors of the presence of aCAD(+) were  $FER_{HDL}$ , age, smoking, and diabetes. If only laboratory tests were included in the multivariate logistic model,  $FER_{HDL}$  appeared as the sole predictor of aCAD(+).  $\log(TG/HDL-C)$  was an independent predictor when  $FER_{HDL}$  was omitted from multivariate analysis.

**Conclusions:**  $FER_{HDL}$  was the best laboratory predictor of the presence of coronary atherosclerotic lesions.

© 2003 American Association for Clinical Chemistry

Several predictors of coronary atherosclerosis, such as age, male sex, smoking, presence of diabetes, hypertension, obesity, high serum LDL-cholesterol (LDL-C),<sup>3</sup> and low serum HDL-cholesterol (HDL-C) have been well established (1–6). Many other predictors have been studied, including plasma concentrations of triglycerides (TGs) and TG-enriched lipoprotein particles (7–10), lipoprotein particle size (11, 12), apolipoprotein B (apoB) (13), lipoprotein(a), homocysteine, C-reactive protein, and others (14). Various algorithms for predicting coronary atherosclerosis have been established (15), most of which are based on large epidemiologic, cohort, and cross-sectional studies (16).

We assessed both clinical and laboratory predictors of atherosclerosis in 1108 consecutive patients undergoing coronary angiography with the following objectives: (a) to compare the associations between the various clinical and laboratory indices and the presence or absence of angiographically defined coronary artery disease (aCAD); and (b) to examine the potential usefulness of a new functional

<sup>1</sup> Department of Pathology and Laboratory Medicine, University of British Columbia, Healthy Heart Program/Lipid Clinic, St. Paul's Hospital, Vancouver, BC V6Z 1Y6, Canada.

<sup>2</sup> Institute of Physiology, Academy of Sciences of the Czech Republic, Prague, Czech Republic 14220.

\*Address correspondence to this author at: Healthy Heart Program, St. Paul's Hospital, B180-1081 Burrard St., Vancouver, BC V6Z 1Y6, Canada. Fax 604-806-8590/3; e-mail <jifr@interchange.ubc.ca>.

Received June 9, 2003; accepted August 19, 2003.

Previously published online at DOI: 10.1373/clinchem.2003.022558

<sup>3</sup> Nonstandard abbreviations: LDL-C and HDL-C, LDL and HDL-cholesterol, respectively; TG, triglyceride; apoB, apolipoprotein B; aCAD, angiographically defined coronary artery disease;  $FER_{HDL}$ , fractional esterification rate of cholesterol in plasma depleted of apoB-containing lipoproteins; MI, myocardial infarction; BP, blood pressure; TC, total cholesterol; HDL-C, HDL-unesterified cholesterol; CI, confidence interval; and BMI, body mass index.

test for indirect assessment of HDL and LDL particle size, i.e., the fractional esterification rate in apoB-depleted plasma ( $FER_{HDL}$ ) (17–19).  $FER_{HDL}$  measures the rate of esterification of free cholesterol in HDL in plasma depleted of apoB-containing lipoproteins. The esterification is mediated by lecithin-cholesterol acyl transferase, an enzyme that transfers acyl of fatty acids from lecithin to unesterified cholesterol, which leads to the formation of cholesterol esters. The esterification rate is related to the particle size: it is fastest in the smallest HDL particles and slower in larger particles (17–19).

In this study we also compared the predictive power of two lipid indexes: the commonly used ratio of plasma cholesterol to HDL-C and the logarithmically transformed ratio of plasma TGs to HDL-C (20).

### Materials and Methods

#### PATIENTS

The participants were consenting individuals undergoing coronary angiography at Vancouver General and St. Paul's Hospitals in 1993–1994. The indications for angiography included exercise-induced chest pain, previously diagnosed myocardial infarction (MI), atypical chest pain, aortic stenosis/regurgitation, and mitral regurgitation. Patients with unstable angina and MI within the preceding 2 months were excluded from the study. Coronary angiograms were obtained by the standard techniques with multiple views recorded. The angiograms were defined regarding the number of vessels involved (0, 1, 2, or 3) and the lesion severity, i.e., more than or less than 50% lumen obstruction. For the purpose of this study, angiograms with a >50% stenosis in one or more arteries were classified as aCAD(+). Those with a maximum stenosis of ≤10% in any artery were defined as aCAD(−). Each participant in the study filled out a questionnaire that included their demographic data and presence/absence of the major risk factors, including personal and family history of vascular disease. Height, weight, and waist circumference were measured at the same time. All participants signed a consent form that had been approved by University of British Columbia and St. Paul's Hospital ethics committees.

#### LABORATORY ASSAYS

Blood samples were collected after an overnight fast into EDTA-containing Vacutainer tubes on the day of the angiogram, kept at 4 °C, and centrifuged within 12 h. Aliquots of plasma were frozen at −70 °C until analyses. Plasma total cholesterol (TC), TGs, total HDL-C, and HDL-unesterified cholesterol (HDL-UC) were measured enzymatically. LDL-C was calculated using the Friedewald equation, and apoB was measured nephelometrically (Beckman Array System). The radioassay for  $FER_{HDL}$  had been described previously (17–19). Briefly, apoB-containing lipoproteins are precipitated from EDTA plasma by phosphotungstic acid and  $MgCl_2$ . To the supernatant, which contains plasma with HDL only, is

added a filter-paper disk containing a trace of [ $^3H$ ]cholesterol. After an overnight incubation at 4 °C, the disk is removed and the plasma with labeled HDL is heated to 37 °C and incubated for 30 min. After the incubation, lipids are extracted by ethanol and separated by thin-layer chromatography.  $FER_{HDL}$  (%/h) is calculated from the ratio of radioactive unesterified to radioactive esterified cholesterol.

#### STATISTICAL ANALYSIS

The data are presented as means (SD) for all individuals and separately for men and women with positive [aCAD(+)] and with negative angiography findings [aCAD(−)]. Differences between those with positive and negative findings were tested by unpaired Student and Wilcoxon rank-sum tests. For variables with high interindividual variation (3 SD > mean), statistical analyses were performed on log-transformed values (as has been done for TGs,  $FER_{HDL}$ , and TG/HDL). Correlation was tested by a bivariate Spearman nonparametric rank correlation test. The association of measured variables with the presence of aCAD(+) was evaluated in both univariate and multivariate logistic regression models. Stepwise logistic regression analysis was used to predict the presence or absence of aCAD. The model was based on values of the set of variables that had significant association on univariate analysis. Odds ratios and 95% confidence intervals (CIs) for aCAD(+) vs aCAD(−) were calculated (Table 5). Data were adjusted for the categorical variables, such as smoking and diabetes, and for continuous variables, such as age, body mass index (BMI), waist circumference, TC, LDL-C, apoB, TGs, HDL-C, HDL-UC,  $FER_{HDL}$ , log(TG/HDL-C), and TC/HDL-C. The statistical packages SPSS, Base 11.0, and SPSS Regression Models 11.0 were used to analyze the data.

### Results

#### CHARACTERISTICS OF THE STUDY POPULATION

The study cohort consisted of 320 women and 788 men (age range, 18–88 years). Their characteristics are shown in Table 1. Of the initial diagnoses, the most common was CAD (52% of women, 64% of men). Twenty-one percent of the women and 33% of the men had received a previous diagnosis of MI, whereas peripheral vascular disease or cerebral vascular disease was previously diagnosed in 15% and 9% of the women and 10% and 6% of the men, respectively. Eighty-one percent of the men and 58% of the women had positive findings on coronary angiography. Adult-onset diabetes was diagnosed in 17% of women and 16% of men, hypertension in 42% of women and 36% of men, and the BMI was >30 in 27% of both genders. More than 80% of the women were postmenopausal. Fifty-seven percent of the women and 76% of the men were current or former smokers, ~11% of both men and women did not exercise regularly, and 20% the men and 40% of the women were nondrinkers. Only

**Table 1. Characteristics of patient cohort.**

|                  | Women (n = 320) |      | Men (n = 788) |      |
|------------------|-----------------|------|---------------|------|
|                  | n               | %    | n             | %    |
| BMI >30.0        | 88              | 27.5 | 211           | 26.8 |
| CAD              | 166             | 51.9 | 502           | 63.7 |
| PVD <sup>a</sup> | 49              | 15.3 | 79            | 10.0 |
| CVD              | 28              | 8.8  | 49            | 6.2  |
| MI               | 66              | 20.6 | 258           | 32.7 |
| aCAD(+)          | 186             | 58.1 | 638           | 81.0 |
| DM               | 55              | 17.2 | 124           | 15.7 |
| Hypertension     | 134             | 41.9 | 280           | 35.5 |
| Smoke (ever)     | 177             | 56.9 | 591           | 76.3 |
| Exercise (never) | 35              | 11.3 | 82            | 10.6 |
| Drinking (never) | 123             | 39.5 | 165           | 21.3 |
| Lipid medication | 45              | 14.5 | 127           | 16.4 |
| Menopause        | 258             | 83.0 |               |      |

<sup>a</sup> PVD, peripheral vascular disease; CVD, cerebral vascular disease; DM, diabetes mellitus.

~15% of the men and women in this cohort were using lipid-lowering medications.

#### UNIVARIATE ANALYSES

The mean (SD) for each continuous variable in the negative [aCAD(-)] and positive angiography [aCAD(+)] groups are shown in Tables 2 and 3. Analyses of these variables were carried out separately for men (Table 2) and women (Table 3). The *P* values indicate the results of independent sample *t*-tests for differences between those with positive and negative angiographic findings. In the whole cohort, CAD(+) and aCAD(-) individuals differed significantly in age; TG, apoB, and HDL-C concentrations; FER<sub>HDL</sub>; and log(TG/HDL-C). However, there were no

**Table 2. Univariate analysis of CAD risk factors for men with negative and positive angiographic findings.**

|                                | Mean (SD)            |                      | <i>P</i> <sup>a</sup> |
|--------------------------------|----------------------|----------------------|-----------------------|
|                                | aCAD(-)<br>(n = 136) | aCAD(+)<br>(n = 637) |                       |
| Age, years                     | 54.6 (12.2)          | 60.9 (10.6)          | <b>&lt;0.0001</b>     |
| BMI, kg/m <sup>2</sup>         | 27.9 (5.1)           | 28.5 (4.7)           | 0.375                 |
| Waist circumference, cm        | 99.4 (12.8)          | 99.5 (11.8)          | 0.894                 |
| BP <sub>Systolic</sub> , mmHg  | 134 (25)             | 133 (22)             | 0.900                 |
| BP <sub>Diastolic</sub> , mmHg | 80 (13)              | 78 (12)              | 0.237                 |
| TC, mmol/L                     | 5.08 (1.03)          | 5.07 (1.00)          | 0.996                 |
| UC, <sup>b</sup> mmol/L        | 1.43 (0.30)          | 1.46 (0.38)          | 0.304                 |
| TGs, mmol/L                    | 1.71 (0.98)          | 1.97 (1.40)          | <b>0.032</b>          |
| LDL-C, mmol/L                  | 3.75 (0.95)          | 3.49 (0.91)          | <b>0.003</b>          |
| apoB, mmol/L                   | 0.91 (0.22)          | 0.96 (0.22)          | <b>0.020</b>          |
| HDL-C, mmol/L                  | 0.96 (0.27)          | 0.91 (0.22)          | <b>0.013</b>          |
| HDL-UC, mmol/L                 | 0.21 (0.06)          | 0.20 (0.05)          | <b>0.004</b>          |
| FER <sub>HDL</sub> , %/h       | 22.57 (7.72)         | 25.61 (8.62)         | <b>0.0001</b>         |
| Log(TG/HDL-C)                  | 0.205 (0.27)         | 0.277 (0.29)         | <b>0.008</b>          |
| TC/HDL-C                       | 5.57 (1.61)          | 5.92 (2.24)          | 0.074                 |

<sup>a</sup> Statistically significant values are in bold font.

<sup>b</sup> UC, unesterified cholesterol.

**Table 3. Univariate analysis of CAD risk factors for women with negative and positive angiographic findings.**

|                                | Mean (SD)            |                      | <i>P</i> <sup>a</sup> |
|--------------------------------|----------------------|----------------------|-----------------------|
|                                | aCAD(-)<br>(n = 124) | aCAD(+)<br>(n = 186) |                       |
| Age, years                     | 61.2 (11.1)          | 64.2(10.3)           | <b>0.017</b>          |
| BMI, kg/m <sup>2</sup>         | 26.8 (5.3)           | 27.7 (5.7)           | 0.164                 |
| Waist circumference, cm        | 89.6 (13.4)          | 93.8 (15.1)          | <b>0.021</b>          |
| BP <sub>Systolic</sub> , mmHg  | 136 (22)             | 135 (27)             | 0.755                 |
| BP <sub>Diastolic</sub> , mmHg | 75 (11)              | 75 (11)              | 0.668                 |
| TC, mmol/L                     | 5.17 (1.08)          | 5.51 (1.41)          | <b>0.026</b>          |
| UC, <sup>b</sup> mmol/L        | 1.43 (0.31)          | 1.59 (0.50)          | <b>0.001</b>          |
| TGs, mmol/L                    | 1.38 (0.69)          | 1.94 (1.36)          | <b>&lt;0.0001</b>     |
| LDL-C, mmol/L                  | 3.74 (1.08)          | 3.84 (1.18)          | 0.444                 |
| apoB, mmol/L                   | 0.93 (0.27)          | 1.03 (0.27)          | <b>0.003</b>          |
| HDL-C, mmol/L                  | 1.16 (0.33)          | 1.08 (0.31)          | <b>0.032</b>          |
| HDL-UC, mmol/L                 | 0.25 (0.08)          | 0.24 (0.08)          | 0.434                 |
| FER <sub>HDL</sub> , %/h       | 17.86 (7.25)         | 21.04 (8.28)         | <b>0.001</b>          |
| Log(TG/HDL-C)                  | 0.045 (0.24)         | 0.21 (0.22)          | <b>&lt;0.0001</b>     |
| TC/HDL-C                       | 4.78 (0.25)          | 5.53 (2.48)          | <b>0.005</b>          |

<sup>a</sup> Statistically significant values are indicated by bold font.

<sup>b</sup> UC, unesterified cholesterol.

significant differences in systolic BP and BMI. Men, but not women, with positive findings had higher LDL-C and lower HDL-UC. Women, but not men, with positive findings had significantly increased waist circumference, TC, unesterified cholesterol, and TC/HDL-C ratio.

Of the categorical variables, both smoking and diabetes were significantly higher in the cohort members with positive findings (*P* < 0.001). In addition, women with CAD(+) had a significantly higher frequency of hypertension (*P* < 0.04). Neither alcohol consumption nor physical inactivity were significantly associated with positive findings.

**Table 4. Pearson correlations (*r*) between logFER<sub>HDL</sub> and anthropometric and biochemical variables.**

|                         | aCAD(-)<br>(n = 260)  |                       | aCAD(+)<br>(n = 823) |                       |
|-------------------------|-----------------------|-----------------------|----------------------|-----------------------|
|                         | LogFER <sub>HDL</sub> | <i>P</i> (two-tailed) | FER <sub>HDL</sub>   | <i>P</i> (two-tailed) |
| BMI                     | 0.324                 | 0.000                 | 0.297                | <0.0001               |
| Waist circumference     | 0.401                 | 0.000                 | 0.323                | <0.0001               |
| BP <sub>Systolic</sub>  | -0.074                | NS <sup>a</sup>       | -0.047               | NS                    |
| BP <sub>Diastolic</sub> | 0.117                 | NS                    | 0.094                | 0.032                 |
| TC                      | 0.138                 | 0.036                 | 0.215                | <0.0001               |
| UC                      | 0.296                 | 0.000                 | 0.339                | <0.0001               |
| LogTG                   | 0.592                 | 0.000                 | 0.631                | <0.0001               |
| LDL-C                   | NS                    | NS                    | 0.009                | NS                    |
| apoB                    | 0.402                 | 0.000                 | 0.364                | <0.0001               |
| HDL-C                   | -0.648                | 0.000                 | -0.645               | <0.0001               |
| HDL-UC                  | -0.662                | 0.000                 | -0.605               | <0.0001               |
| Log(TG/HDL-C)           | 0.751                 | 0.000                 | 0.748                | <0.0001               |
| TC/HDL-C                | 0.580                 | 0.000                 | 0.555                | <0.0001               |

<sup>a</sup> NS, not significant.

## CORRELATION ANALYSIS

The relationships between plasma lipid/apoprotein measurements and  $FER_{HDL}$  are shown in Table 4. There was a strong correlation between  $FER_{HDL}$ , plasma TGs, HDL-C, and HDL-UC. Whereas the correlation between  $FER_{HDL}$  and either total or unesterified cholesterol was rather weak (albeit significant), the correlation between  $FER_{HDL}$  and apoB was much stronger. There was an even stronger correlation between  $FER_{HDL}$  and both calculated indexes [ $\log(TG/HDL-C)$  and  $TC/HDL-C$ ]. There was no significant difference in any the above correlations between the aCAD(+) and CAD(-) groups.

Conversion of the continuous variables (TGs, HDL-C, and apoB) into quartiles may better illustrate the relationships between these specific markers and  $FER_{HDL}$ :  $FER_{HDL}$  increased from 13.2%/h to 35.7%/h between the first and fourth quartiles of  $\log TG$  and HDL-C. This increase was related independently to both of these variables (Fig. 1). The relationship between  $FER_{HDL}$  and apoB and HDL-C was similar (Fig. 2).

## LOGISTIC STEPWISE REGRESSION MODEL

The results of logistic regression analysis of the differences between the aCAD(+) and aCAD(-) groups are shown in Table 5. Although the univariate models demonstrated significant differences in several variables between the aCAD(+) and aCAD(-) groups (Tables 2 and 3), many did not appear in the model adjusted for age, BMI, waist circumference, diabetes, smoking,  $\log TG$ , LDL-C, apoB, HDL-C, HDL-UC,  $\log FER_{HDL}$ , and the indices  $\log(TG/HDL-C)$  and  $TC/HDL-C$ . In the logistic regression model that included the whole cohort, the most powerful predictors were  $FER_{HDL}$ , age, smoking, and diabetes (Table 5). When  $\log FER_{HDL}$  was omitted from the model, the logarithmically transformed ratio of TGs to HDL-C became the best independent predictor of aCAD(+). The model examining the predictive power of laboratory tests [TC,  $\log TG$ , LDL-C, apoB, HDL-C, HDL-

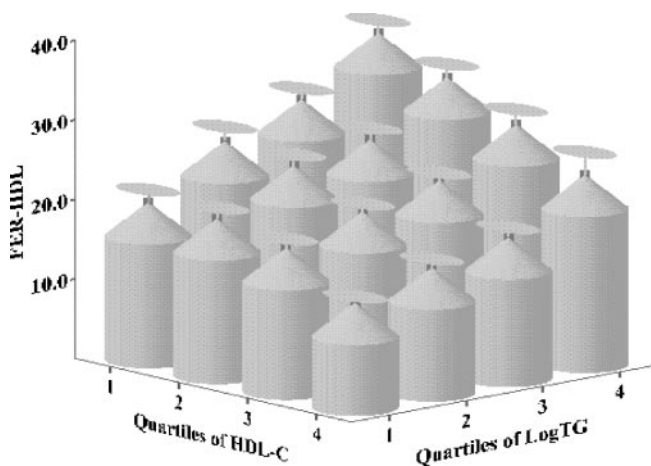

Fig. 1. Three-dimensional model relating  $FER_{HDL}$  values to the quartiles of  $\log TG$  and HDL-C.

The columns indicate the means. Error bars, 95% CIs of the means.

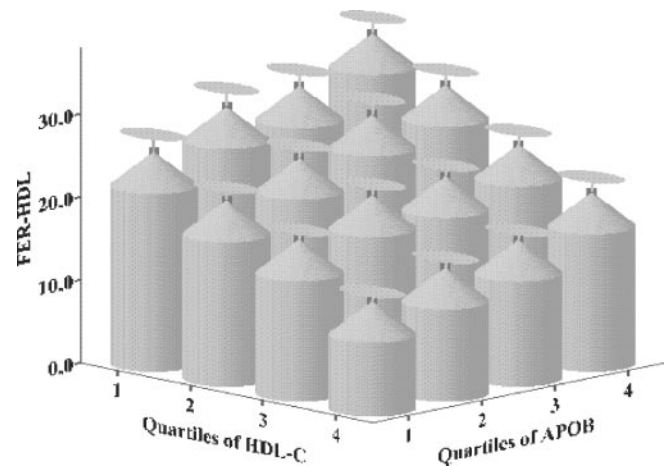

Fig. 2. Three-dimensional model relating  $FER_{HDL}$  values to the quartiles of apoB and HDL-C.

The columns indicate the means. Error bars, 95% CIs of the means.

UC,  $\log FER_{HDL}$ ,  $\log(TG/HDL-C)$ , and  $TC/HDL-C$ ] only indicated that  $FER_{HDL}$  was the sole significant predictor (odds ratio = 28.33;  $P < 0.0001$ ).

## Discussion

We examined the predictive value of different demographic, clinical, and biochemical indices for findings on selective coronary angiography in a cohort of 1108 patients.

We have shown that individuals with positive angiographic findings tend to be older, smokers, have a history of diabetes, and also have higher TG and apoB concentrations, lower HDL-C, and only mildly increased TC and LDL-C. These results are in agreement with previous reports of association of these "classic" markers with angiographically confirmed CAD (21). We have shown that  $FER_{HDL}$ , an indirect measure of lipoprotein particle size (22–24), is a better predictor of positive angiographic findings than the classic markers. Recent reports confirmed that the smallest LDL (25) and small HDL (26) particles are most strongly related to coronary disease progression. In our cohort,  $FER_{HDL}$  was the most effective predictor of positive angiographic findings among all clinical and biochemical markers assessed (Table 5). In women, in agreement with previous findings (8), there was a strong relationship between plasma TGs and positive coronary findings. In the logistic regression model in which  $FER_{HDL}$  was omitted, the ratio of TGs to HDL-C was the most effective predictor. This index,  $\log(TG/HDL)$ , strongly correlated with  $FER_{HDL}$  and several other risk factors for CAD (20). In the current study,  $\log(TG/HDL-C)$  appeared to be a better predictor of positive angiographic findings than the commonly used ratio  $TC/HDL-C$  (27, 28).

The value of  $FER_{HDL}$  is strongly related to changes in HDL-C, TGs, and apoB (Figs. 1 and 2). The concentrations of all these analytes are known to influence lipoprotein



**Table 5. Stepwise logistic regression model for all study participants.**

| Independent predictor of aCAD(+) <sup>a</sup> | B <sup>b</sup> | SE    | exp(B) | 95% CI for exp(B) | P       |
|-----------------------------------------------|----------------|-------|--------|-------------------|---------|
| Regression model with FER <sub>HDL</sub>      |                |       |        |                   |         |
| LogFER <sub>HDL</sub>                         | 3.795          | 0.557 | 44.495 | (14.927–132.633)  | <0.0001 |
| Age                                           | 0.048          | 0.008 | 1.050  | (1.035–1.068)     | <0.0001 |
| Smoking                                       | 0.841          | 0.179 | 2.319  | (1.624–3.267)     | <0.0001 |
| DM                                            | 0.641          | 0.297 | 1.899  | (1.060–3.402)     | 0.031   |
| Regression model without FER <sub>HDL</sub>   |                |       |        |                   |         |
| Log(TG/HDL-C)                                 | 1.620          | 0.330 | 4.055  | (2.646–9.660)     | <0.0001 |
| Age                                           | 0.042          | 0.008 | 1.043  | (1.027–1.059)     | <0.0001 |
| Smoking                                       | 0.852          | 0.178 | 2.343  | (1.652–3.323)     | <0.0001 |
| Waist circumference                           | 0.015          | 0.007 | 1.015  | (1.001–1.029)     | 0.031   |
| DM                                            | 0.715          | 0.296 | 2.044  | (1.144–3.652)     | 0.016   |

<sup>a</sup> Set of predictor variables: age, BMI, waist circumference, smoking, diabetes mellitus, logTG, LDL-C, apoB, HDL-C, HDL-UC, logFER<sub>HDL</sub>, log(TG/HDL-C), TC/HDL-C.

<sup>b</sup> B, coefficient; SE, standard error of B, exp(B), estimated odds ratio; DM, diabetes mellitus.

particle size and number. For example, higher TG concentrations are associated with the presence of small VLDL and LDL particles (29), and the apoB concentration is directly linked to the number of LDL particles (13).

It has been well documented that small, dense LDL particles are more susceptible to oxidation and are a better substrate for formation of foam cells than large cholesterol-rich LDL particles (6). On the other hand, increased HDL-C is usually associated with an increase in protective HDL<sub>2b</sub> particles (30), which inhibit esterification of cholesterol, i.e., reduce FER<sub>HDL</sub> (23), whereas low HDL-C is seen in the presence of small particles (11), which increase FER<sub>HDL</sub> (23). The value of FER<sub>HDL</sub> as an independent indicator of angiographic endpoints was reported recently in the HDL-atherosclerosis study (31).

The size of our cohort and the number of markers measured compare favorably with other studies in this field (32–84). Most of these studies were limited in the number of patients examined, relative to one gender or age or race group, and many of them examined only some of the markers assessed in our study.

There are several limitations to our findings. The angiographic assessment of vascular disease, although currently an accepted “gold standard”, is less sensitive and specific than newer methods, such as intravascular ultrasound. Furthermore, the assessment of the angiographic findings was only semiquantitative. The effects of beta-blockers and lipid-lowering drugs when taken into account in both the CAD(+) and CAD(–) groups had no effect on statistical analyses; however, they may have influenced several of the biochemical markers measured. Finally, it may be disputed that our control group (patients with negative findings on angiography) were not truly healthy individuals because they had risk factors that led to their angiography in the first place. We believe that this actually makes our data stronger because the differences observed might have been much greater if a control group of patients without any risk factors have been used. There were only 25 patients with 10–50% obstruction.

In conclusion, after correcting for the presence of classic risk factors and several other variables, FER<sub>HDL</sub>, age, smoking, and diabetes were the best independent predictors of the presence of angiographically confirmed CAD in both genders. In women, serum TGs were also an independent predictor. Thus, the particle size of lipoproteins assessed by a functional test (FER<sub>HDL</sub>) appeared to be the superior biochemical predictor of positive findings on coronary angiography.

This study was supported by grants from the British Columbia Heart & Stroke Foundation and Grant NA/6590-3 from the Ministry of Health of the Czech Republic. We would like to acknowledge the competent technical assistance of L. Adler.

## References

1. Castelli WP. Lipids, risk factors and ischaemic heart disease. *Atherosclerosis* 1996;124(Suppl):S1–9.
2. Doll R. Fifty years of research on tobacco. *J Epidemiol Biostat* 2000;5:321–9.
3. Verges BL. Dyslipidaemia in diabetes mellitus. Review of the main lipoprotein abnormalities and their consequences on the development of atherogenesis. *Diabetes Metab* 1999;25(Suppl 3):32–40.
4. Kaplan NM. The deadly quartet. Upper-body obesity, glucose intolerance, hypertriglyceridemia, and hypertension. *Arch Intern Med* 1989;149:1514–20.
5. Gotto AM Jr. High-density lipoprotein cholesterol: an updated view. *Curr Opin Pharmacol* 2001;1:109–12.
6. Steinberg D, Gotto AM Jr. Preventing coronary artery disease by lowering cholesterol levels. *JAMA* 1999;282:2043–50.
7. Assmann G, Schulte H. Relation of high-density lipoprotein cholesterol and triglycerides to incidence of atherosclerotic coronary artery disease (the PROCAM experience). Prospective Cardiovascular Munster study. *Am J Cardiol* 1992;15:733–7.
8. Hokanson JE, Austin MA. Plasma triglyceride level is a risk factor for cardiovascular disease independent of high-density lipoprotein cholesterol level: a meta-analysis of population-based prospective studies. *J Cardiovasc Risk* 1996;3:213–9.
9. Ooi TC, Ooi DS. The atherogenic significance of an elevated plasma triglyceride level. *Crit Rev Clin Lab Sci* 1998;35:489–516.

10. Koren E, Corder C, Mueller G, Centurion H, Hallum G, Fesmire J, et al. Triglyceride enriched lipoprotein particles correlate with the severity of coronary artery disease. *Atherosclerosis* 1996;122:105–15.
11. Drexel H, Aman FW, Rentsch K, Neunschwander C, Leuthy A, Khan SI, et al. Relation of the level of high-density lipoprotein subfractions to the presence and extent of coronary artery disease. *Am J Cardiol* 1992;70:436–40.
12. Campos H, Genest JJ Jr, Blijlevens E, McNamara JR, Jenner JL, Ordovas JM, et al. Low density lipoprotein particle size and coronary artery disease. *Arterioscler Thromb* 1992;12:187–95.
13. Sniderman AD, Furberg CD, Keech A, Roeters van Lennep JE, Frohlich J, Jungner I, et al. Apolipoproteins versus lipids as indices of coronary risk and as targets for statin treatment. *Lancet* 2003;361:777–80.
14. Frohlich J, Dobiášová M, Lear S, Lee K. The role of risk factors in the development of atherosclerosis. *Crit Rev Clin Lab Sci* 2001;38:401–40.
15. Grundy SM, Pasternak R, Greenland P, Smith S Jr, Fuster V. AHA/ACC scientific statement. Assessment of cardiovascular risk by use of multiple-risk-factor assessment equations: a statement for healthcare professionals from the American Heart Association and the American College of Cardiology. *J Am Coll Cardiol* 1999;34:1348–59.
16. Assmann G, Cullen P, Schulte H. The Munster Heart Study (PROCAM): results of follow-up group at 8 years. *Eur Heart J* 1998;19(Suppl A):A2–11.
17. Dobiášová M, Frohlich J. Measurement of fractional esterification rate of cholesterol in plasma depleted of apoprotein B containing lipoprotein: methods and normal values. *Physiol Res* 1996;45:65–73.
18. Dobiášová M, Frohlich J. Assays of lecithin cholesterol acyltransferase (LCAT). In: Ordovas JM, ed. *Methods in molecular biology. Lipoprotein protocols*. Totowa, NJ: Humana Press, 1998:217–30.
19. Dobiášová M, Adler L, Ohta T, Frohlich J. Effect of labeling of plasma lipoproteins with [<sup>3</sup>H]cholesterol on values of esterification rate of cholesterol in apolipoprotein B depleted plasma. *J Lipid Res* 2000;41:1356–7.
20. Dobiášová M, Frohlich J. The plasma parameter log(TG/HDL-C) as an atherogenic index: correlation with lipoprotein particle size and esterification rate in apoB-lipoprotein-depleted plasma (FER<sub>HDL</sub>). *Clin Biochem* 2001;34:583–8.
21. Bolibar I, Thompson SG, von-Eckardstein A, Sandkamp M, Assmann G. Dose-response relationships of serum lipid measurements with the extent of coronary stenosis. Strong, independent, and comprehensive. ECAT Angina Pectoris Study Group. *Arterioscler Thromb Vasc Biol* 1995;15:1035–42.
22. Dobiášová M, Stříbrná J, Sparks DL, Pritchard PH, Frohlich J. Cholesterol esterification rates in very low density lipoprotein- and low density lipoprotein-depleted plasma: relation to high density lipoprotein subspecies, sex, hyperlipidemia and coronary artery disease. *Arterioscler Thromb* 1991;11:64–70.
23. Dobiášová M, Stříbrná J, Pritchard P, Frohlich J. Cholesterol esterification rate in plasma depleted of very low and low density lipoprotein is controlled by the proportion of HDL2 and HDL3 subclasses: study in hypertensive and normal middle aged and septuagenarian men. *J Lipid Res* 1992;33:1411–8.
24. Ohta T, Saku K, Takata K, Nagata N, Maung KK, Matsuda I. Fractional esterification rate of cholesterol in high density lipoprotein (HDL) can predict the particle size of low density lipoprotein and HDL in patients with coronary heart disease. *Atherosclerosis* 1997;135:205–12.
25. Williams PT, Superko HR, Haskell WL, Alderman EL, Blanche PJ, Holl LG, et al. Smallest LDL particles are most strongly related to coronary disease progression in men. *Arterioscler Thromb Vasc Biol* 2003;23:314–21.
26. Rosenson RS, Otvos JD, Freedman DS. Relations of lipoprotein subclass levels and low-density lipoprotein size to progression on coronary artery disease in the Pravastatin Limitation of Atherosclerosis in the Coronary Arteries (PLAC-I) trial. *Am J Cardiol* 2002;90:89–94.
27. Hong MK, Romm PA, Reagan K, Green CE, Rackley CE. Usefulness of the total cholesterol to high-density lipoprotein cholesterol ratio in predicting angiographic coronary artery disease in women. *Am J Cardiol* 1991;68:1646–50.
28. Luria MH, Erel J, Sapoznikov D, Gotsman MS. Cardiovascular risk factor clustering and ratio of total cholesterol to high-density lipoprotein cholesterol in angiographically documented coronary artery disease. *Am J Cardiol* 1991;67:31–6.
29. Kwiterovich PO Jr. Clinical relevance of the biochemical, metabolic, and genetic factors that influence low-density lipoprotein heterogeneity. *Am J Cardiol* 2002;90:30i–47i.
30. Miller N. Association of high-density lipoprotein subclasses and apolipoproteins with ischemic heart disease and coronary atherosclerosis. *Am Heart J* 1987;113:589–97.
31. Brown BG, Zhao XQ, Chait A, Fisher LD, Cheung MC, Morse JS, et al. Simvastatin and niacin, antioxidant vitamins, or the combination for the prevention of coronary disease. *N Engl J Med* 2001;345:1583–92.
32. O'Sullivan JJ, Matthew A, Conroy RM, Erwin RJ, Duggan PF. Relation of angiographically defined coronary artery disease to serum lipoprotein levels. *Clin Cardiol* 1990;13:841–4.
33. Yang T, Doherty TM, Wong ND, Detrano RC. Alcohol consumption, coronary calcium, and coronary heart disease events. *Am J Cardiol* 1999;84:802–6.
34. Inoue T, Uchida T, Kamishirado H, Takayanagi K, Morooka S. Antibody against oxidized low density lipoprotein may predict progression or regression of atherosclerotic coronary artery disease. *J Am Coll Cardiol* 2001;37:1871–6.
35. Pan QX, Liu P, Wang SC, Pan JT, Sun BY, Wu XY, et al. The study of serum apoprotein levels as indicators for the severity of angiographically assessed coronary artery disease. *Am J Clin Pathol* 1991;95:597–600.
36. Reinhart RA, Gani K, Arndt MR, Broste SK. Apolipoproteins A-I and B as predictors of angiographically defined coronary artery disease. *Arch Intern Med* 1990;150:1629–33.
37. Ford ES, Cooper RS, Simmons B, Castaner A. Serum lipids, lipoproteins and apolipoproteins in black patients with angiographically defined. *J Clin Epidemiol* 1990;43:425–32.
38. McGill DA, Talsma P, Ardlie NG. Relationship of blood cholesterol and apoprotein B levels to angiographically defined coronary artery disease in young males. *Coron Artery Dis* 1993;4:261–70.
39. Westerveld HT, van Lennep JE, van Lennep HW, Liem AH, de Boo JA, van de Schouw YT, et al. Apolipoprotein B and coronary artery disease in women: a cross-sectional study in women. *Arterioscler Thromb Vasc Biol* 1998;18:1101–7.
40. Sahi N, Pahlajani DB, Sainani GS. Apolipoproteins A-1 and B as predictors of angiographically assessed coronary artery disease. *J Assoc Physicians India* 1993;41:713–5.
41. Korhonen T, Savolainen MJ, Koistinen MJ, Ikaheimo M, Linnaluoto MK, Kervinen K, et al. Association of lipoprotein cholesterol and triglycerides with the severity of coronary artery disease in men and women. *Atherosclerosis* 1996;127:213–20.
42. Schwertner HA, Fischer JR Jr. Comparison of various lipid, lipoprotein, and bilirubin combinations as risk factors for predicting coronary artery disease. *Atherosclerosis* 2000;150:381–7.
43. Guerci AD, Spadaro LA, Goodman KJ, Lledo-Perez A, Newstein D, Lerner G, et al. Comparison of electron beam computed tomography scanning and conventional risk factor assessment for the

- prediction of angiographic coronary artery disease. *J Am Coll Cardiol* 1998;32:673–9.
44. Bhatnagar D, Durrington PN, Channon KM, Prais H, Mackness MI. Increased transfer of cholesteryl esters from high density lipoproteins to low density and very low density lipoproteins in patients with angiographic evidence of coronary artery disease. *Atherosclerosis* 1993;98:25–32.
  45. Erren M, Reinecke H, Junker R, Fobker M, Schulte H, Schurek JO, et al. Systemic inflammatory parameters in patients with atherosclerosis of the coronary and peripheral arteries. *Arterioscler Thromb Vasc Biol* 1999;19:2355–63.
  46. Saku K, Zhang B, Ohta T, Arakawa KJ. Quantity and function of high density lipoprotein as an indicator of coronary atherosclerosis. *Am Coll Cardiol* 1999;33:436–43.
  47. Marshall HW, Morrison LC, Wu LL, Anderson JL, Corneli PS, Stauffer DM, et al. Apolipoprotein polymorphisms fail to define risk of coronary artery disease. Results of a prospective, angiographically controlled study. *Circulation* 1994;89:567–77.
  48. Fujiwara R, Kutsumi Y, Hayashi T, Kim SS, Misawa T, Tada H, et al. Metabolic risk factors in the normolipidemic male patients with angiographically defined coronary artery disease. *Jpn Circ J* 1990;54:493–500.
  49. Smuts CM, Weich HF, Weight MJ, Faber M, Kruger M, Lombard CJ, et al. Free cholesterol concentrations in the high-density lipoprotein subfraction-3 as a risk indicator in patients with angiographically documented coronary artery disease. *Coron Artery Dis* 1994;5:331–8.
  50. Reedman DS, Croft JB, Anderson AJ, Byers T, Jacobsen SJ, Gruchow HW, et al. The relation of documented coronary artery disease to levels of total cholesterol and high-density lipoprotein cholesterol. *Epidemiology* 1994;5:80–7.
  51. Johansson J, Carlson LA, Landou C, Hamsten A. High density lipoproteins and coronary atherosclerosis. A strong inverse relation with the largest particles is confined to normotriglyceridemic patients. *Arterioscler Thromb* 1991;11:174–82.
  52. French JK, Elliott JM, Williams BF, Nixon DJ, Denton MA, White HD. Association of angiographically detected coronary artery disease with low levels of high-density lipoprotein cholesterol and systemic hypertension. *Am J Cardiol* 1993;71:505–10.
  53. Violaris AG, Melkert R, Serruys PW. Influence of serum cholesterol and cholesterol subfractions on restenosis after successful coronary angioplasty. A quantitative angiographic analysis of 3336 lesions. *Circulation* 1994;90:2267–79.
  54. Arteaga A, Martinez A, Pollak F, Borghesi L, Catalan L, Acosta AM, et al. Indicators of atherosclerosis risk. Evaluation with coronary angiography in non diabetic men with total cholesterol levels equal to or below 240 mg/dl. *Rev Med Chil* 1995;123:145–57.
  55. Romm PA, Green CE, Reagan K, Rackley CE. Relation of serum lipoprotein cholesterol levels to presence and severity of angiographic coronary artery disease. *Am J Cardiol* 1991;67:479–83.
  56. Miwa K, Nakagawa K. Risk factors that discriminate 'high-risk' from 'low-risk' Japanese patients with coronary artery disease. *Jpn Circ J* 2000;64:825–30.
  57. Miller M, Mead LA, Kwiterovich PO Jr, Pearson TA. Dyslipidemias with desirable plasma total cholesterol levels and angiographically demonstrated coronary artery disease. *Am J Cardiol* 1990;65:1–5.
  58. Nikkila M, Koivula T, Niemela K, Sisto T. High density lipoprotein cholesterol and triglycerides as markers of angiographically assessed coronary artery disease. *Br Heart J* 1990;63:78–81.
  59. Sutherland WH, Restieaux NJ, Nye ER, Williams MJ, de Jong SA, Robertson MC, et al. LDL composition and angiographically determined progression of atherosclerotic lesions during simvastatin therapy. *Arterioscler Thromb Vasc Biol* 1998;18:577–83.
  60. Negri M, Sheiban I, Arigliano PL, Tonni S, Montresor G, Carlini S, et al. Interrelation between angiographic severity of coronary artery disease and plasma levels of insulin, C-peptide and plasminogen activator inhibitor-1. *Am J Cardiol* 1993;72:397–401.
  61. Ley CJ, Swan J, Godsland IF, Walton C, Crook D, Stevenson JC. Insulin resistance, lipoproteins, body fat and hemostasis in nonobese men with angina and a normal or abnormal coronary angiogram. *J Am Coll Cardiol* 1994;23:377–83.
  62. Tribouilloy CM, Peltier M, Iannetta-Peltier MC, Zhu Z, Andrejak M, Lesbre JP. Relation between low-density lipoprotein cholesterol and thoracic aortic atherosclerosis. *Am J Cardiol* 1999;84:603–5, A9.
  63. Miller BD, Alderman EL, Haskell WL, Fair JM, Krauss RM. Predominance of dense low-density lipoprotein particles predicts angiographic benefit of therapy in the Stanford Coronary Risk Intervention Project. *Circulation* 1996;94:2146–53.
  64. Griffin BA, Freeman DJ, Tait GW, Thomson J, Caslake MJ, Packard CJ, et al. Role of plasma triglyceride in the regulation of plasma low density lipoprotein (LDL) subfractions: relative contribution of small, dense LDL to coronary heart disease risk. *Atherosclerosis* 1994;106:241–53.
  65. Linden T, Taddei-Peters W, Wilhelmssen L, Herlitz J, Karlsson T, Ullstrom C, et al. Serum lipids, lipoprotein(a) and apo(a) isoforms in patients with established coronary artery disease and their relation to disease and prognosis after coronary by-pass surgery. *Atherosclerosis* 1998;137:175–86.
  66. O'Brien T, Nguyen TT, Hallaway BJ, Hodge D, Bailey K, Holmes D, et al. The role of lipoprotein A-I and lipoprotein A-I/A-II in predicting coronary artery disease. *Arterioscler Thromb Vasc Biol* 1995;15:228–31.
  67. Alaupovic P, Mack WJ, Knight-Gibson C, Hodis HN. The role of triglyceride-rich lipoprotein families in the progression of atherosclerotic lesions as determined by sequential coronary angiography from a controlled clinical trial. *Arterioscler Thromb Vasc Biol* 1997;17:715–22.
  68. Wilson SH, Celermajer DS, Nakagomi A, Wyndham RN, Janu MR, Ben Freedman S. Vascular risk factors correlate to the extent as well as the severity of coronary atherosclerosis. *Coron Artery Dis* 1999;10:449–53.
  69. Karpe F, Taskinen MR, Nieminen MS, Frick MH, Kesaniemi YA, Pasternack A, et al. Remnant-like lipoprotein particle cholesterol concentration and progression of coronary and vein-graft atherosclerosis in response to gemfibrozil treatment. *Atherosclerosis* 2001;157:181–7.
  70. Masuoka H, Ishikura K, Kamei S, Obe T, Seko T, Okuda K, et al. Predictive value of remnant-like particles cholesterol/high-density lipoprotein cholesterol ratio as a new indicator of coronary artery disease. *Am Heart J* 1998;136:226–30.
  71. Hearn JA, DeMaio SJ Jr, Roubin GS, Hammarstrom M, Sgoutas D. Predictive value of lipoprotein (a) and other serum lipoproteins in the angiographic diagnosis of coronary artery disease. *Am J Cardiol* 1990;66:1176–80.
  72. Wang XL, Tam C, McCredie RM, Wilcken DE. Determinants of severity of coronary artery disease in Australian men and women. *Circulation* 1994;89:1974–81.
  73. Patsch JR, Miesenböck G, Hopferwieser T, Muhlberger V, Knapp E, Dunn JK, et al. Relation of triglyceride metabolism and coronary artery disease. Studies in the postprandial state. *Arterioscler Thromb* 1992;12:1336–45.
  74. Nielsen NE, Olsson AG, Swahn E. Plasma lipoprotein particle concentrations in postmenopausal women with unstable coronary artery disease. Analysis of diagnostic accuracy using receiver operating characteristics. *J Intern Med* 2000;247:43–52.
  75. Hodis HN, Mack WJ, Azen SP, Alaupovic P, Pogoda JM, LaBree L, et al. Triglyceride- and cholesterol-rich lipoproteins have a differential effect on mild/moderate and severe lesion progression as

- assessed by quantitative coronary angiography in a controlled trial of lovastatin. *Circulation* 1994;90:42–9.
76. Phillips NR, Waters D, Havel RJ. Plasma lipoproteins and progression of coronary artery disease evaluated by angiography and clinical events. *Circulation* 1993;88:2762–70.
77. Tkac I, Kimball BP, Lewis G, Uffelman K, Steiner G. The severity of coronary atherosclerosis in type 2 diabetes mellitus is related to the number of circulating triglyceride-rich lipoprotein particles. *Arterioscler Thromb Vasc Biol* 1997;17:3633–8.
78. Syvanne M, Pajunen P, Kahri J, Lahdenpera S, Ehnholm C, Nieminen MS, et al. Determinants of the severity and extent of coronary artery disease in patients with type-2 diabetes and in nondiabetic subjects. *Coron Artery Dis* 2001;12:99–106.
79. Hodis HN, Mack WJ. Triglyceride-rich lipoproteins and progression of atherosclerosis. *Eur Heart J* 1998;19(Suppl A):A40–4.
80. Mack WJ, Krauss RM, Hodis HN. Lipoprotein subclasses in the Monitored Atherosclerosis Regression Study (MARS). Treatment effects and relation to coronary angiographic progression. *Arterioscler Thromb Vasc Biol* 1996;16:697–704.
81. Tornvall P, Bavenholm P, Landou C, de Faire U, Hamsten A. Relation of plasma levels and composition of apolipoprotein B-containing lipoproteins to angiographically defined coronary artery disease in young patients with myocardial infarction. *Circulation* 1993;88(5 Pt 1):2180–9.
82. Lemieux I, Pascot A, Couillard C, Lamarche B, Tchernof A, Almeras N, et al. Hypertriglyceridemic waist: a marker of the atherogenic metabolic triad (hyperinsulinemia; hyperapolipoprotein B; small, dense LDL) in men? *Circulation* 2000;102:179–84.
83. Vakkilainen J, Steiner G, Ansquer JC, Aubin F, Rattier S, Foucher C, et al. DAIS Group. Relationships between low-density lipoprotein particle size, plasma lipoproteins, and progression of coronary artery disease: the Diabetes Atherosclerosis Intervention Study (DAIS). *Circulation* 2003;107:1733–7.
84. Third Report of the National Cholesterol Education Program (NCEP) Expert Panel on Detection, Evaluation, and Treatment of High Blood Cholesterol in Adults (Adult Treatment Panel III): final report. *Circulation* 2002;106:3143–421.
85. Francis MC, Frohlich JJ. Coronary artery disease in patients at low risk—apolipoprotein AI as an independent risk factor. *Atherosclerosis* 2001;155:165–70.
